# Supplementary material for: Review article: Towards multi-hazard and multi-risk indicators – a review and recommendations for development and implementation
Source: Copernicus journal article supplement (doi:10.5194/nhess-2024-178), 2024-10-08
Supplement: Supplementary file 1 [file nhess-2024-178-supplement.pdf]

1 **Supplementary information**

2 **Table S1. Search terms used in this study to obtain peer-reviewed literature from Scopus, Web of Science and Pubmed**  
 3 **including multi-hazard/risk (Level 1 search terms) and indicators (Level 2 search terms).**

| Level 1: Multi-hazard/risk |                        | Level 2: Indicators |                          |
|----------------------------|------------------------|---------------------|--------------------------|
| 1                          | multi-hazard*          | 1                   | indicator*               |
| 2                          | multihazard*           | 2                   | index*                   |
| 3                          | multi hazard*          | 3                   | indices                  |
| 4                          | multi-risk*            | 4                   | metric*                  |
| 5                          | multirisk*             | 5                   | disaster risk indicator* |
| 6                          | multi risk*            |                     |                          |
| 7                          | compound* hazard*      |                     |                          |
| 8                          | compound* event*       |                     |                          |
| 9                          | compound* risk*        |                     |                          |
| 10                         | interacting hazard*    |                     |                          |
| 11                         | interacting event*     |                     |                          |
| 12                         | interacting risk*      |                     |                          |
| 13                         | cascading hazard*      |                     |                          |
| 14                         | cascading event*       |                     |                          |
| 15                         | cascading risk*        |                     |                          |
| 16                         | interconnected hazard* |                     |                          |
| 17                         | interconnected event*  |                     |                          |
| 18                         | interconnected risk*   |                     |                          |
| 19                         | interrelated hazard*   |                     |                          |
| 20                         | interrelated event*    |                     |                          |
| 21                         | interrelated risk*     |                     |                          |
| 22                         | multiple hazard*       |                     |                          |

4  
 5  
 6

7 Table S2. Search strings used in Scopus, Web of Science and PubMed.

| Scopus                                                                                                                                                                                                                                                                                                                                                                                                                                                                                                                                                                                                                                                                                                                                                                                                                                                                                                                                                                                                                                                                                                                                                                                                | Web of Science                                                                                                                                                                                                                                                                                                                                                                                                                                                                                                                                                                                                                                                                                                                                                                                                                                                                                                                                                                                                                                                                                                                                                                                                                                                                                                                                                                                                                                                                                                         | PubMed                                                                                                                                                                                                                                                                                                                                                                                                                                                                                                                                                                                                                                                                                                                                                                                                                                                                                                                                                                                                                                                                                                                                                                                                                                                                                                                                                                                                                      |
|-------------------------------------------------------------------------------------------------------------------------------------------------------------------------------------------------------------------------------------------------------------------------------------------------------------------------------------------------------------------------------------------------------------------------------------------------------------------------------------------------------------------------------------------------------------------------------------------------------------------------------------------------------------------------------------------------------------------------------------------------------------------------------------------------------------------------------------------------------------------------------------------------------------------------------------------------------------------------------------------------------------------------------------------------------------------------------------------------------------------------------------------------------------------------------------------------------|------------------------------------------------------------------------------------------------------------------------------------------------------------------------------------------------------------------------------------------------------------------------------------------------------------------------------------------------------------------------------------------------------------------------------------------------------------------------------------------------------------------------------------------------------------------------------------------------------------------------------------------------------------------------------------------------------------------------------------------------------------------------------------------------------------------------------------------------------------------------------------------------------------------------------------------------------------------------------------------------------------------------------------------------------------------------------------------------------------------------------------------------------------------------------------------------------------------------------------------------------------------------------------------------------------------------------------------------------------------------------------------------------------------------------------------------------------------------------------------------------------------------|-----------------------------------------------------------------------------------------------------------------------------------------------------------------------------------------------------------------------------------------------------------------------------------------------------------------------------------------------------------------------------------------------------------------------------------------------------------------------------------------------------------------------------------------------------------------------------------------------------------------------------------------------------------------------------------------------------------------------------------------------------------------------------------------------------------------------------------------------------------------------------------------------------------------------------------------------------------------------------------------------------------------------------------------------------------------------------------------------------------------------------------------------------------------------------------------------------------------------------------------------------------------------------------------------------------------------------------------------------------------------------------------------------------------------------|
| <p>TITLE-ABS-KEY-AUTH<br/>           (“multi-hazard*” OR<br/>           “multihazard*” OR “multi<br/>           hazard*” OR “multi-risk*” OR<br/>           “multirisk*” OR “multi risk*”<br/>           OR “compound* hazard*” OR<br/>           “compound* event*” OR<br/>           “compound* risk*” OR<br/>           “interacting hazard*” OR<br/>           “interacting event*” OR<br/>           “interacting risk” OR<br/>           “cascading hazard*” OR<br/>           “cascading event*” OR<br/>           “cascading risk*” OR<br/>           “interconnected hazard*” OR<br/>           “interconnected event*” OR<br/>           “interconnected risk*” OR<br/>           “interrelated hazard*” OR “<br/>           interrelated event*” OR<br/>           “interrelated risk*” OR<br/>           “multiple hazard*”) AND<br/>           TITLE-ABS-KEY-<br/>           AUTH(“indicator*” OR<br/>           “index*” OR “indices” OR<br/>           “metric*” OR “disaster risk<br/>           indicator*”)<br/>           Results = 769<br/>           Date Range is 2015 – present<br/>           (day of search 3/11/2023) =<br/>           621<br/>           English = 597</p> | <p>(TI=(“multi-hazard*” OR<br/>           “multihazard*” OR “multi<br/>           hazard*” OR “multi-risk*” OR<br/>           “multirisk*” OR “multi risk*”<br/>           OR “compound* hazard*” OR<br/>           “compound* event*” OR<br/>           “compound* risk*” OR<br/>           “interacting hazard*” OR<br/>           “interacting event*” OR<br/>           “interacting risk” OR<br/>           “cascading hazard*” OR<br/>           “cascading event*” OR<br/>           “cascading risk*” OR<br/>           “interconnected hazard*” OR<br/>           “interconnected event*” OR<br/>           “interconnected risk*” OR<br/>           “interrelated hazard*” OR “<br/>           interrelated event*” OR<br/>           “interrelated risk*” OR<br/>           “multiple hazard*”) OR<br/>           AB=(“multi-hazard*” OR<br/>           “multihazard*” OR “multi<br/>           hazard*” OR “multi-risk*” OR<br/>           “multirisk*” OR “multi risk*”<br/>           OR “compound* hazard*” OR<br/>           “compound* event*” OR<br/>           “compound* risk*” OR<br/>           “interacting hazard*” OR<br/>           “interacting event*” OR<br/>           “interacting risk” OR<br/>           “cascading hazard*” OR<br/>           “cascading event*” OR<br/>           “cascading risk*” OR<br/>           “interconnected hazard*” OR<br/>           “interconnected event*” OR<br/>           “interconnected risk*” OR<br/>           “interrelated hazard*” OR “</p> | <p>(“multi-<br/>           hazard*”[Title/Abstract] OR<br/>           “multihazard*”[Title/Abstract]<br/>           OR<br/>           “multi<br/>           hazard*”[Title/Abstract] OR<br/>           “multi-risk*”[Title/Abstract]<br/>           OR<br/>           “multirisk*”[Title/Abstract]<br/>           OR<br/>           “multi<br/>           risk*”[Title/Abstract] OR<br/>           “compound*<br/>           hazard*”[Title/Abstract] OR<br/>           “compound*<br/>           event*”[Title/Abstract] OR<br/>           “compound*<br/>           risk*”[Title/Abstract] OR<br/>           “interacting<br/>           hazard*”[Title/Abstract] OR<br/>           “interacting<br/>           event*”[Title/Abstract] OR<br/>           “interacting<br/>           risk”<br/>           [Title/Abstract] OR<br/>           “cascading<br/>           hazard*”[Title/Abstract] OR<br/>           “cascading<br/>           event*”[Title/Abstract] OR<br/>           “cascading<br/>           risk*”[Title/Abstract] OR<br/>           “interconnected<br/>           hazard*”[Title/Abstract] OR<br/>           “interconnected<br/>           event*”[Title/Abstract] OR<br/>           “interconnected<br/>           risk*”[Title/Abstract] OR<br/>           “interrelated<br/>           hazard*”[Title/Abstract] OR “<br/>           interrelated<br/>           event*”[Title/Abstract] OR</p> |

|  |                                                                                                                                                                                                                                                                                                                                                                                                                                                                                                                                                                                                                                                                                                                                                                                                                                                                                                                                                                                                                                                                                                          |                                                                                                                                                                                                                                                                                                                                                                                                                        |
|--|----------------------------------------------------------------------------------------------------------------------------------------------------------------------------------------------------------------------------------------------------------------------------------------------------------------------------------------------------------------------------------------------------------------------------------------------------------------------------------------------------------------------------------------------------------------------------------------------------------------------------------------------------------------------------------------------------------------------------------------------------------------------------------------------------------------------------------------------------------------------------------------------------------------------------------------------------------------------------------------------------------------------------------------------------------------------------------------------------------|------------------------------------------------------------------------------------------------------------------------------------------------------------------------------------------------------------------------------------------------------------------------------------------------------------------------------------------------------------------------------------------------------------------------|
|  | <p>interrelated event*" OR<br/> "interrelated risk*" OR<br/> "multiple hazard*") OR<br/> AK=("multi-hazard*" OR<br/> "multihazard*" OR "multi<br/> hazard*" OR "multi-risk*" OR<br/> "multirisk*" OR "multi risk*"<br/> OR "compound* hazard*" OR<br/> "compound* event*" OR<br/> "compound* risk*" OR<br/> "interacting hazard*" OR<br/> "interacting event*" OR<br/> "interacting risk" OR<br/> " cascading hazard*" OR<br/> " cascading event*" OR<br/> " cascading risk*" OR<br/> "interconnected hazard*" OR<br/> "interconnected event*" OR<br/> "interconnected risk*" OR<br/> "interrelated hazard*" OR "interrelated event*" OR<br/> "interrelated risk*" OR<br/> "multiple hazard*") AND<br/> (TI=("indicator*" OR "index*" OR "indices" OR "metric*" OR "disaster risk indicator*") OR AB=("indicator*" OR "index*" OR "indices" OR "metric*" OR "disaster risk indicator*") OR AK=("indicator*" OR "index*" OR "indices" OR "metric*" OR "disaster risk indicator*"))</p> <p>Results = 590</p> <p>Date Range is 2015 – present<br/> (day of search 3/11/2023) = 498</p> <p>English = 494</p> | <p>"interrelated risk*" [Title/Abstract] OR<br/> "multiple hazard*" [Title/Abstract]) AND<br/> ("indicator*" [Title/Abstract] OR "index*" [Title/Abstract] OR "indices" [Title/Abstract] OR "metric*" [Title/Abstract] OR "disaster risk indicator*" [Title/Abstract])</p> <p>Results = 109</p> <p>Date Range is 2015 – present<br/> (day of search 3/11/2023) = 84</p> <p>English = 83</p> <p>Free Full Text = 49</p> |
|--|----------------------------------------------------------------------------------------------------------------------------------------------------------------------------------------------------------------------------------------------------------------------------------------------------------------------------------------------------------------------------------------------------------------------------------------------------------------------------------------------------------------------------------------------------------------------------------------------------------------------------------------------------------------------------------------------------------------------------------------------------------------------------------------------------------------------------------------------------------------------------------------------------------------------------------------------------------------------------------------------------------------------------------------------------------------------------------------------------------|------------------------------------------------------------------------------------------------------------------------------------------------------------------------------------------------------------------------------------------------------------------------------------------------------------------------------------------------------------------------------------------------------------------------|
